# Supplementary material for: Immunosuppression for immune-related adverse events during checkpoint inhibition: an intricate balance
Source: PubMed Central journal article supplement (PMC10182067; doi:10.1038/s41698-023-00380-1), 2023-05-12
Supplement: 41698_2023_380_MOESM1_ESM.pdf [file 41698_2023_380_MOESM1_ESM.pdf]

## Immunosuppression for immune-related adverse events during checkpoint inhibition: an intricate balance

Rik J Verheijden MSc<sup>1,2\*</sup>, Mick JM van Eijs MD<sup>1,3</sup>, prof. dr. Anne M May PhD<sup>2</sup>, prof. dr. Femke van Wijk PhD<sup>3</sup>, prof. dr. Karijn PM Suijkerbuijk MD PhD<sup>1</sup>

### Supplementary Information

- Supplementary methods
- Supplementary table 1: Mouse studies on correlation of corticosteroid administration with ICI efficacy
- Supplementary table 2: Clinical reports on the effects of corticosteroids for immune-related adverse events on ICI efficacy compared to all other patients irrespective of irAE occurrence
- Supplementary table 3: Clinical reports on the effects of corticosteroids for immune-related adverse events on immune checkpoint inhibitor efficacy
- Supplementary table 4: Mouse studies on correlation of TNF inhibition with ICI efficacy
- Supplementary table 5: Clinical reports on the effects of TNF inhibition for immune-related adverse events on immune checkpoint inhibitor efficacy
- Supplementary table 6: Mouse studies on correlation of interleukin-6 (receptor) inhibition with ICI efficacy
- Supplementary table 7: Mouse studies on correlation of Janus (JAK) kinase, mammalian target of rapamycin (mTOR) inhibition or hydroxychloroquine (HCQ) with ICI efficacy
- Supplementary table 8: Ongoing clinical trials on immunosuppression for irAE management

## Supplementary Information

### Supplementary methods

Potentially relevant confounders when assessing the impact of immunosuppression for immune checkpoint inhibitor (ICI) induced immune-related adverse events on survival may be:

- Type of ICI: Combined ICI is known to cause more (severe) irAEs which may be treated more vigorously than anti-PD-(L)1 monotherapy. Besides, type of ICI is associated with survival.
- Tumour type: Each cancer type and stage has its own prognosis. Tumour type may therefore strongly impact survival analyses. Although irAE profile may differ slightly according to tumour type (e.g. more often vitiligo with melanoma), its association with IS is unclear.
- irAE type: While irAE type is obviously correlated with its treatment (e.g. vedolizumab only for colitis), two studies observed no association between irAE type and survival<sup>14,46</sup>.
- Other indications for IS: Other indications for corticosteroids include symptomatic brain metastases and as part of supportive care to increase patient comfort, which are both associated with a poor prognosis.
- Other immunosuppressants: patients treated with high dosages of corticosteroids are also more likely to receive second-line immunosuppressants and vice versa, which makes it difficult to differentiate between effects of specific immunosuppressants on ICI efficacy.
- ICI discontinuation and reintroduction: While guidelines propagate discontinuation of ICI when severe irAEs occur, they may be reintroduced more often with less severe irAEs. Therefore, patients with (more) IS might also have received less ICI.

## Supplementary Information

### PubMed search strategy

((("PD-1"[Title/Abstract] OR "PD1"[Title/Abstract] OR "programmed cell death 1"[Title/Abstract] OR "PD-L1"[Title/Abstract] OR "CTLA-4"[Title/Abstract] OR "CTLA4"[Title/Abstract] OR "cytotoxic T-lymphocyte-associated protein 4"[Title/Abstract] OR "CD152"[Title/Abstract]) AND ("anti\*"[Title/Abstract] OR "inhibit\*"[Title/Abstract] OR "blockade"[Title/Abstract])) OR "anti-PD-1"[Title/Abstract] OR "anti-PD1"[Title/Abstract] OR "anti-PD-L1"[Title/Abstract] OR "anti-PDL1"[Title/Abstract] OR "anti-CTLA-4"[Title/Abstract] OR "anti-CTLA4"[Title/Abstract] OR "pembrolizumab"[Title/Abstract] OR "nivolumab"[Title/Abstract] OR "cemiplimab"[Title/Abstract] OR "programmed cell death 1"[Title/Abstract] OR "durvalumab"[Title/Abstract] OR "avelumab"[Title/Abstract] OR "atezolizumab"[Title/Abstract] OR "ipilimumab"[Title/Abstract] OR "tremelimumab"[Title/Abstract] OR "ticilimumab"[Title/Abstract] OR "checkpoint inhibit\*"[Title/Abstract] OR "immune checkpoint"[Title/Abstract] OR "Immune Checkpoint Proteins"[MeSH Terms] AND ("Immunosuppressive Agents"[MeSH Terms] OR "Steroids"[MeSH Terms] OR "steroid\*"[Title/Abstract] OR "corticosteroid\*"[Title/Abstract] OR "glucocorticoid\*"[Title/Abstract] OR "TNF"[Title/Abstract] OR "IL-6"[Title/Abstract] OR "cyclosporine"[Title/Abstract] OR "calcineurin"[Title/Abstract] OR "abatacept"[Title/Abstract] OR "adalimumab"[Title/Abstract] OR "anakinra"[Title/Abstract] OR "azathioprine"[Title/Abstract] OR "balsalazide"[Title/Abstract] OR "baricitinib"[Title/Abstract] OR "basiliximab"[Title/Abstract] OR "bimekizumab"[Title/Abstract] OR "brodalumab"[Title/Abstract] OR "budesonide"[Title/Abstract] OR "canakinumab"[Title/Abstract] OR "certolizumab"[Title/Abstract] OR "ciclosporine"[Title/Abstract] OR "cyclophosphamide"[Title/Abstract] OR "delgocitinib"[Title/Abstract] OR "dexamethasone"[Title/Abstract] OR "everolimus"[Title/Abstract] OR "etanercept"[Title/Abstract] OR "fedratinib"[Title/Abstract] OR "filgotinib"[Title/Abstract] OR "golimumab"[Title/Abstract] OR "guselkumab"[Title/Abstract] OR "hydroxychloroquine"[Title/Abstract] OR "infliximab"[Title/Abstract] OR "intravenous immunoglobulin\*"[Title/Abstract] OR "ivig"[Title/Abstract] OR "ixekizumab"[Title/Abstract] OR "leflunomide"[Title/Abstract] OR "mesalazine"[Title/Abstract] OR "methotrexate"[Title/Abstract] OR "methylprednisolone"[Title/Abstract] OR "mycophenol\*"[Title/Abstract] OR "natalizumab"[Title/Abstract] OR "obinutuzumab"[Title/Abstract] OR "oclacitinib"[Title/Abstract] OR "ocrelizumab"[Title/Abstract] OR "ofatumumab"[Title/Abstract] OR "olsalazine"[Title/Abstract] OR "perficitinib"[Title/Abstract] OR "pimecrolimus"[Title/Abstract] OR "predniso\*"[Title/Abstract] OR "risankizumab"[Title/Abstract] OR "rituximab"[Title/Abstract] OR "ruxolitinib"[Title/Abstract] OR "sarilumab"[Title/Abstract] OR "secukinumab"[Title/Abstract] OR "siltuximab"[Title/Abstract] OR "sirolimus"[Title/Abstract] OR "sulfasalazine"[Title/Abstract] OR "tacrolimus"[Title/Abstract] OR "tildrakizumab"[Title/Abstract] OR "tofacitinib"[Title/Abstract] OR "tocilizumab"[Title/Abstract] OR "tralokinumab"[Title/Abstract] OR "triamcinolone acetonide"[Title/Abstract] OR "upadacitinib"[Title/Abstract] OR "ustekinumab"[Title/Abstract] OR "vedolizumab"[Title/Abstract] OR "vistusertib"[Title/Abstract]) AND "english"[Language] AND 2004/01/01:2022/11/17[Date - Publication]

## Supplementary Information

### Combined bioRxiv and medRxiv search strategies

1. Records posted between 1/1/2021 and 20/10/2022 were searched for:"checkpoint inhibitor HCQ" (8 hits) OR "checkpoint inhibitor hydroxychloroquine" (27 hits), all excluded based on title/abstract.
2. "checkpoint inhibitor mTOR" (534 hits), 2 screened on full text, all excluded.
3. "checkpoint inhibitor JAK" (431 hits), 9 screened on full text, 1 included in data synthesis.

### Clinicaltrials.gov search strategies

(checkpoint AND (inhibitor OR blockade)) AND (corticosteroid OR prednisone OR prednisolone OR methylprednisolone OR dexamethasone) 152 hits

(pembrolizumab OR nivolumab OR cemiplimab OR durvalumab OR avelumab OR atezolizumab OR ipilimumab OR tremelimumab OR ticilimumab) AND (corticosteroid OR prednisone OR prednisolone OR methylprednisolone OR dexamethasone) 143 hits

(checkpoint AND (inhibitor OR blockade) OR pembrolizumab OR nivolumab OR cemiplimab OR durvalumab OR avelumab OR atezolizumab OR ipilimumab OR tremelimumab OR ticilimumab) AND (infliximab OR adalimumab OR budesonide OR vedolizumab OR tocilizumab) 70 hits

(pembrolizumab OR nivolumab OR cemiplimab OR durvalumab OR avelumab OR atezolizumab OR ipilimumab OR tremelimumab OR ticilimumab) AND (cyclosporine OR calcineurin OR abatacept OR anakinra OR azathioprine OR canakinumab OR certolizumab) 10 hits

(pembrolizumab OR nivolumab OR cemiplimab OR durvalumab OR avelumab OR atezolizumab OR ipilimumab OR tremelimumab OR ticilimumab) AND (cyclosporine OR everolimus OR etanercept OR hydroxychloroquine OR mesalazine) 31 hits

(pembrolizumab OR nivolumab OR cemiplimab OR durvalumab OR avelumab OR atezolizumab OR ipilimumab OR tremelimumab OR ticilimumab) AND (methotrexate OR mycophenol OR rituximab OR ruxolitinib OR secukinumab OR sirolimus) 95 hits

(pembrolizumab OR nivolumab OR cemiplimab OR durvalumab OR avelumab OR atezolizumab OR ipilimumab OR tremelimumab OR ticilimumab) AND (sulfasalazine OR tacrolimus OR tofacitinib OR ustekinumab) 2 hits

## Supplementary Information

**Supplementary table 1: Mouse studies on correlation of corticosteroid administration with ICI efficacy**

| Author                         | Type ICI           | Mice                                                           | Immunosuppression                                                                         | N <sub>mice</sub> | Results                                                                                                                                                              | Effect |
|--------------------------------|--------------------|----------------------------------------------------------------|-------------------------------------------------------------------------------------------|-------------------|----------------------------------------------------------------------------------------------------------------------------------------------------------------------|--------|
| Maxwell<br>2018 <sup>35</sup>  | αPD-1              | C57BL/6 mice<br>MC38 colon carcinoma<br>αPD-1 at d8, 10 and 12 | DEX 10mg/kg/d<br>concurrent (d8-12);<br>late (d13-17);<br>continuous with taper<br>(d8->) | 8                 | 4/8 CR at d50 in anti-PD-1 alone vs 1/8,<br>1/8 and 0/8 in αPD-1 + DEX groups; ↑<br>tumour growth rate at d38 in αPD-1 + DEX<br>(all groups) compared to αPD-1 alone | -      |
|                                |                    | C57BL/6 mice<br>GL261-luc glioma<br>αPD-1 d10, 12 and 14 after | DEX 10mg/kg/d<br>concurrent (d8-12);<br>late (d13-17);<br>continuous with taper<br>(d8->) | 10                | No significant differences in tumour control<br>or survival between αPD-1 and αPD-1 +<br>DEX mice                                                                    | ±      |
| Giles<br>2018 <sup>31</sup>    | αCTLA-4            | C57BL/6 mice<br>GL261-luc glioma<br>αCTLA-4 d13, 16 and 19     | DEX 1mg/kg/d d7-50                                                                        | 7-8               | ↑ survival in αCTLA-4 + DEX vs αCTLA-4<br>alone although not formally tested and no<br>↑ survival in αCTLA-4 vs no treatment                                         | (+)    |
| Aston<br>2019 <sup>36</sup>    | αPD-1 +<br>αCTLA-4 | BALB/c mice<br>AB1 mesothelioma<br>cICI d12, 14, 16            | DEX 1.25mg/kg/d d12-<br>15                                                                | 15                | Non-significant trend towards ↓ tumour<br>control and ↓ survival in cICI + DEX vs<br>cICI alone                                                                      | ±/-    |
| Tokunaga<br>2019 <sup>38</sup> | αCTLA-4            | BALB/c mice<br>CMS5a-NY-ESO-1<br>αCTLA-4 d3, 6, 9              | DEX 20μg or 2000μg<br>d3, 5, 7 <b>early</b>                                               | 5-11              | ↓ tumour control in αCTLA-4 + high dose<br>DEX vs αCTLA-4 alone; similar tumour<br>control in αCTLA-4 + low dose DEX                                                 | -;±    |
|                                | αCTLA-4            | BALB/c mice<br>CMS5a-NY-ESO-1<br>αCTLA-4 d3, 6, 9              | DEX 20μg or 2000μg<br>d17, 19, 21 <b>late</b>                                             | 5-7               | Similar tumour control in αCTLA-4 +<br>low/high dose DEX vs αCTLA-4 alone                                                                                            | ±      |
|                                | αCTLA-4            | BALB/c mice<br>CT26-NY-ESO-1<br>αCTLA-4 d3, 6, 9               | DEX 20μg or 2000μg<br>d3, 5, 7 <b>early</b>                                               | 4-10              | Similar tumour control in αCTLA-4 +<br>low/high dose DEX vs αCTLA-4 alone                                                                                            | ±      |
|                                | αCTLA-4            | BALB/c mice<br>CT26-NY-ESO-1<br>αCTLA-4 d3, 6, 9               | DEX 20μg or 2000μg<br>d17, 19, 21 <b>late</b>                                             | 4-10              | Similar tumour control in αCTLA-4 +<br>low/high dose DEX vs αCTLA-4 alone                                                                                            | ±      |

## Supplementary Information

| Author                        | Type ICI        | Mice                                                                                                            | Immunosuppression                                  | N <sub>mice</sub> | Results                                                                                                                                               | Effect |
|-------------------------------|-----------------|-----------------------------------------------------------------------------------------------------------------|----------------------------------------------------|-------------------|-------------------------------------------------------------------------------------------------------------------------------------------------------|--------|
|                               | αPD-L1          | BALB/c mice<br>CT26-NY-ESO-1<br>αPD-L1 d3, 6, 9                                                                 | DEX 20μg or 2000μg<br>d3, 5, 7 <b>early</b>        | 5-10              | ↓ tumour control in αPD-L1 + high dose DEX vs αCTLA-4 alone; non-significant trend towards ↓ tumour control in αPD-L1 + low dose DEX vs αCTLA-4 alone | -;±    |
|                               | αPD-L1          | BALB/c mice<br>CT26-NY-ESO-1<br>αPD-L1 d3, 6, 9                                                                 | DEX 20μg or 2000μg<br>d17, 19, 21 <b>late</b>      | 5-6               | Similar tumour control in PD-L1 + low/high dose DEX vs αPD-L1 alone                                                                                   | ±      |
| Acharya 2020 <sup>30</sup>    | αPD-1 + αCTLA-4 | C57BL/6 mice<br>MC38 colon carcinoma<br>cICI d7, 21, 35, 49 and 63                                              | DEX 10mg/kg/d d7-17                                | 9-10              | ↓ tumour control in cICI + DEX vs cICI alone                                                                                                          | -      |
| Iorgulescu 2021 <sup>32</sup> | αPD-1           | C57BL/6 mice<br>GL261-luc2 glioma<br>αPD-1 d6, 9, 12, 15, (18, 21, 24 and 27)                                   | DEX 1mg/kg/d,<br>2.5mg/kg/d and<br>10mg/kg/d d6-27 | 16-42             | ↓ tumour control and ↓ survival in αPD-1 + DEX vs αPD-1 alone, with increasing differences with increasing dose of DEX                                | -      |
| Xiang 2021 <sup>37</sup>      | αPD-1           | NOD/SCID mice<br>PBMC infusion d1 and 15<br>SW1990 pancreatic cancer injection d2<br>αPD-1 on d5, 12, 19 and 26 | DEX 0.1mg/kg/3d d3-28                              | 5                 | ↑ tumour control in αPD-1 + DEX vs αPD-1 alone                                                                                                        | +      |
|                               |                 | NOD/SCID mice<br>PBMC infusion d1 and 15<br>SGC-7901 gastric cancer injection d2<br>αPD-1 on d5, 12, 19 and 26  | DEX 0.1mg/kg/3d d3-28                              | 5                 | ↑ tumour control in αPD-1 + DEX vs αPD-1 alone                                                                                                        | +      |

N<sub>mice</sub>: number of mice per group; αPD-1: programmed cell death 1 blockade; αCTLA-4: cytotoxic T lymphocyte-4 blockade; ICI: immune checkpoint inhibitor; cICI: combined ICI; DEX: dexamethasone

## Supplementary Information

**Supplementary table 2: Clinical reports on the effects of corticosteroids for immune-related adverse events on ICI efficacy compared to all other patients irrespective of irAE occurrence**

| Author                       | Type ICI                  | Cancer   | Design                                                                                                                   | N <sub>CS</sub> /N <sub>total</sub> | Results                                                                                                                                                                            | Effect |
|------------------------------|---------------------------|----------|--------------------------------------------------------------------------------------------------------------------------|-------------------------------------|------------------------------------------------------------------------------------------------------------------------------------------------------------------------------------|--------|
| Riudavets 2020 <sup>41</sup> | αPD-(L)1 ± αCTLA-4 /chemo | NSCLC    | OC; average ≥10mg/d prednisone eq for irAEs vs all pts with <10mg/d                                                      | 63/267                              | OS p=0.314                                                                                                                                                                         | ±      |
| Bai 2021 <sup>46</sup>       | αPD-1                     | Melanoma | OC; irAEs with peak dose ≥60mg/d prednisone eq vs all other (as time-varying variable to account for immortal time bias) | 29/90<br>90/419<br>29/90<br>90/419  | OS HR <sub>adj,dev</sub> 1.29 (0.72-2.33)<br>OS HR <sub>adj,val</sub> 0.82 (0.57-1.18)<br>PFS HR <sub>adj,dev</sub> 1.79 (1.05-3.06)<br>PFS HR <sub>adj,val</sub> 1.29 (0.95-1.75) | ±/-    |
| Mouri 2021 <sup>42</sup>     | αPD-(L)1                  | NSCLC    | OC; within primary non-progressors (PD <6m excluded); ≥10mg≥2w CS for irAEs vs all other                                 | 44/126                              | mOS 35.0 vs 41.0m (p=0.28)<br>mPFS 11.7 vs 16.0m (p=0.037)                                                                                                                         | ±/-    |
| Johnson 2015 <sup>48</sup>   | αCTLA-4                   | Melanoma | OC; CS for irAEs vs all other                                                                                            | 12/34                               | OS no difference (p=0.31)                                                                                                                                                          | ±      |
| Horvat 2015 <sup>49</sup>    | αCTLA-4                   | Melanoma | OC; CS for irAEs vs all other                                                                                            | 80/262                              | OS no difference (p=0.97)<br>TTF improved with CS (p=0.07)                                                                                                                         | ±/+    |
| Maher 2019 <sup>50</sup>     | αPD-(L)1                  | UCC      | Pooled RCTs; within responders; CS for any indication vs no CS                                                           | 84/351                              | No difference in duration of response HR 1.09 (0.70-1.69)                                                                                                                          | ±      |
| Vitale 2020 <sup>51</sup>    | αPD-1                     | RCC      | OC; CS for irAE vs all other but only 85 of total 167 pts included                                                       | 33/85                               | OS HR 0.58 (0.26-1.29)<br>PFS HR 0.66 (0.36-1.22)<br>ORR OR 1.45 (0.54-3.88)                                                                                                       | ±/+    |

## Supplementary Information

| Author                                     | Type ICI         | Cancer        | Design                                                                               | N <sub>CS</sub> /N <sub>total</sub> | Results                                                                      | Effect |
|--------------------------------------------|------------------|---------------|--------------------------------------------------------------------------------------|-------------------------------------|------------------------------------------------------------------------------|--------|
|                                            |                  |               |                                                                                      |                                     | DCR OR 1.22 (0.48-3.11)                                                      |        |
| Shafqat 2018 <sup>52</sup>                 | αPD-(L)1         | Solid tumours | OC; CS for irAE vs all other                                                         | 21/157                              | PFS HR 0.383 (0.160-0.918)                                                   | ±      |
| Arheden 2019 <sup>53</sup>                 | αPD-1            | Melanoma      | OC; CS for irAE vs all other                                                         | 25/130                              | OS HR 0.59 (0.30-1.19)                                                       | ±/+    |
| Skribek 2021 <sup>54</sup>                 | αPD-(L)1 ± chemo | NSCLC         | OC; CS for irAE vs all other                                                         | 31/135                              | OS and PFS no difference (p=0.308 and p=0.380)                               | ±      |
| Gaucher 2021 <sup>55</sup>                 | ICI              | Solid tumours | OC; CS for irAE vs no CS for any indication                                          | 21/316                              | OS HR 1.01 (0.56-1.80)<br>ORR OR <sub>adj</sub> 0.69 (0.52-6.56)             | ±      |
| Ishihara 2021 <sup>43</sup>                | αPD-1 + αCTLA-4  | RCC           | OC; CS for irAE vs all other                                                         | 7/59                                | 1yOS 83.3% vs 87.0% (p=0.968)<br>mPFS 8.32 vs 12.2m (p=0.638)                | ±      |
| Lafayolle de la Bruyère 2021 <sup>47</sup> | ICI              | Solid tumours | OC; CS for ≥gr3 irAE vs all other                                                    | 45/864                              | OS HR <sub>adj</sub> 0.99 (0.66-1.5)<br>PFS HR <sub>adj</sub> 1.3 (0.91-2.0) | ±      |
| Paderi 2021 <sup>44</sup>                  | αPD-(L)1         | Solid tumours | OC; CS for irAE vs all other                                                         | 41/146                              | PFS no difference (p=0.161)                                                  | ±      |
| Weber 2009 <sup>45</sup>                   | αCTLA-4          | Melanoma      | RCT; <b>upfront</b> αCTLA-4+ <b>budosenide</b> vs αCTLA-4 alone (similar irAE rates) | 58/115                              | BORR 12.1% vs 15.8%<br>DCR 31% vs 35%<br>mOS 17.7 vs 19.3m                   | ±      |

αPD-(L)1: programmed cell death (ligand) 1 blockade; αCTLA-4: cytotoxic T lymphocyte-4 blockade; ICI: immune checkpoint inhibitor; NSCLC: non-small cell lung cancer; UCC: urothelial cell carcinoma; RCC: renal cell carcinoma; OC: observational cohort study; RCT: randomised controlled trial; irAE: immune-related adverse event; CS: corticosteroid; PFS: progression free survival; OS: overall survival; mOS: median OS; TTF: time to treatment failure; (B)ORR: (best) objective response rate; DCR: disease control rate; HR: hazard ratio; OR: odds ratio; adj: adjusted



## Supplementary Information

**Supplementary table 3: Clinical reports on the effects of corticosteroids for immune-related adverse events on immune checkpoint inhibitor efficacy**

| Author                                     | Type ICI | Cancer             | Design                                                                                                                                                                            | N <sub>1CS</sub> /N <sub>total</sub> | Results                                                                                                                                                                              | Effect |
|--------------------------------------------|----------|--------------------|-----------------------------------------------------------------------------------------------------------------------------------------------------------------------------------|--------------------------------------|--------------------------------------------------------------------------------------------------------------------------------------------------------------------------------------|--------|
| Eggermont 2020 <sup>13</sup>               | αPD-1    | Melanoma; adjuvant | RCT; pts with irAEs without or <30d CS vs placebo; >30d CS for irAEs vs placebo                                                                                                   | 63/190                               | RFS HR w CS 0.34 (0.21-0.56)<br>RFS HR wo CS 0.50 (0.23-1.07)                                                                                                                        | ±/-    |
| Bai 2021 <sup>46</sup>                     | αPD-1    | Melanoma           | OC; within irAE; peak dose ≥60mg/d prednisone eq vs <60mg/d (post-irAE survival 8w landmark analysis)                                                                             | 12/88<br>29/418<br>11/83<br>26/404   | OS HR <sub>adj,dev</sub> 5.95 (2.20-16.09)<br>OS HR <sub>adj,val</sub> 1.97 (1.15-3.39)<br>PFS HR <sub>dev,val</sub> 5.37 (2.10-13.70)<br>PFS HR <sub>adj,val</sub> 1.69 (1.04-2.76) | -      |
| Dahl 2022 <sup>56</sup>                    | ICI      | Solid tumours      | OC; within irAE treated with infliximab; start dose of CS tapering ≥75mg/d prednisolone eq vs <75mg/d; survival from first infliximab dose                                        | 65/139                               | OS HR <sub>adj</sub> 1.67 (1.04-2.69)                                                                                                                                                | -      |
| Lafayolle de la Bruyère 2021 <sup>47</sup> | ICI      | Solid tumours      | OC; within ≥gr3 irAE; any CS vs no CS; note: analyses may have led to overestimation of HRs                                                                                       | 45/78                                | OS HR <sub>adj</sub> 1.8 (0.9-3.4)<br>PFS HR <sub>adj</sub> 3.0 (1.6-5.4)                                                                                                            | ±/-    |
| Robert 2021 <sup>61</sup>                  | αPD-1    | Melanoma           | Pooled RCTs; within non-progressors with irAEs <21w; with systemic CS for irAEs vs without CS; note: landmark analyses may have led to biased HRs                                 | 17/79                                | OS HR <sub>adj</sub> 0.86 (0.32-2.28)<br>PFS HR <sub>adj</sub> 1.45 (0.76-2.79)                                                                                                      | ±      |
| Faje 2018 <sup>62</sup>                    | αCTLA-4  | Melanoma           | OC; within hypophysitis; average ≤7.5mg/d prednsion eq in 2 months after hypophysitis diagnosis vs >7.5mg/d (irrespective of indication, but similar % with cranial radiotherapy) | 50/64                                | OS HR <sub>adj</sub> 0.24 (0.07-0.62)<br>TTF HR <sub>adj</sub> 0.31 (0.12-0.70)<br>PFS HR 0.36 (0.14-0.77)                                                                           | -      |

## Supplementary Information

| Author                       | Type ICI                  | Cancer                   | Design                                                                                                                               | N <sub>↑CS</sub> /N <sub>total</sub> | Results                                                                                                                                                            | Effect |
|------------------------------|---------------------------|--------------------------|--------------------------------------------------------------------------------------------------------------------------------------|--------------------------------------|--------------------------------------------------------------------------------------------------------------------------------------------------------------------|--------|
| Li 2021 <sup>63</sup>        | αPD-1 ± αCTLA-4           | Melanoma                 | OC; within ≥gr3 hepatitis; initial ≥1.5mg/kg/d methylprednisolone eq vs <1.5mg/kg/d (irrespective of indication); post-irAE survival | 53/117                               | HR <sub>adj</sub> OS 1.1 (0.6-2.0)                                                                                                                                 | ±      |
| Riudavets 2020 <sup>41</sup> | αPD-(L)1 ± αCTLA-4 /chemo | NSCLC                    | OC; within irAE pts; average ≥10mg/d prednisone eq vs <10mg/d                                                                        | 63/152                               | OS HR 2.05 (1.13–3.73)                                                                                                                                             | -      |
| Thompson 2021 <sup>64</sup>  | ICI                       | Solid tumours            | OC; within colitis; average ≥1mg/kg/d ≥1w prednisone eq vs ≤7.5mg/d ≥2m; ≥7.5mg/kg/d ≥2m vs ≤7.5mg/d ≥2m (n=34 received αTNF±VEDO)   | 41/60<br>30/49                       | OS HR <sub>adj</sub> 1.62 (0.56-4.70)<br>PFS HR <sub>adj</sub> 2.54 (1.11-5.80)<br>OS HR <sub>adj</sub> 0.69 (0.22-2.07)<br>PFS HR <sub>adj</sub> 1.28 (0.57-3.64) | ±/-    |
| Wang 2018 <sup>65</sup>      | αPD-(L)1 ± αCTLA-4        | Solid tumours            | OC; within diarrhea; with CS±αTNF vs without CS±αTNF                                                                                 | 79/117                               | OS no difference (all: p=0.232; only st IV: p=0.169)                                                                                                               | ±      |
| Min 2015 <sup>66</sup>       | αCTLA-4                   | Melanoma                 | OC; within hypophysitis; >30mg/d >1w hydrocortisone eq vs ≤30mg/d for hypophysitis (n=5), other irAEs (8) or brain metastases (2)    | 15/25                                | 12mOS 80% (SE 10.8%) vs 89% (SE 10.5%)                                                                                                                             | N/A    |
| Paderi 2021 <sup>44</sup>    | αPD-(L)1                  | Solid tumours            | OC; within steroid treated irAEs; peak >1mg/kg/d prednisone eq vs 0.5-1mg/kg/d and cumulative >500mg vs <500mg                       | 16/41                                | PFS no difference (p=0.166 and p=0.578)                                                                                                                            | ±      |
| Romanski 2020 <sup>58</sup>  | ICI                       | Melanoma                 | OC; within hepatitis; >4000mg prednisolone vs <4000mg prednisolone                                                                   | 8/30                                 | PD in 62.5% vs 22.7%                                                                                                                                               | N/A    |
| Gauci 2021 <sup>57</sup>     | ICI                       | Melanoma                 | OC; within hepatitis; with CS for irAE vs without                                                                                    | 13/21                                | 2yOS 56% vs 54% p=0.83                                                                                                                                             | ±      |
| Dimitriou 2021 <sup>59</sup> | ICI                       | Melanoma                 | OC; within irAEs; CS+αTNF/anti-IL6 vs CS only vs no CS within small subgroups according to therapy and setting                       | ≤22/≤54                              | RFS/PFS and OS no difference (all p≥0.29)                                                                                                                          | ±      |
| Pan 2020 <sup>60</sup>       | αPD-1                     | Melanoma<br>NSCLC<br>RCC | OC; within irAEs; >10mg prednisone eq >2w vs >10mg prednisone eq <2w (irrespective of indication)                                    | 8/13<br>10/11<br>1/3                 | 2yOS 37% vs 80%<br>2yOS 40% vs 0%<br>2yOS 100% vs 100%                                                                                                             | N/A    |

N<sub>↑CS</sub>/N<sub>total</sub>: number of patients in highest dosage group/total number of patients in analysis; αPD-(L)1: programmed cell death (ligand) 1 blockade; αCTLA-4: cytotoxic T lymphocyte-4 blockade; ICI: immune checkpoint inhibitor; chemo: chemotherapy; NSCLC: non-small cell lung cancer; RCT: randomised controlled

## Supplementary Information

trial; OC: observational cohort study; irAE: immune-related adverse event; CS: corticosteroid; eq: equivalent;  $\alpha$ TNF: tumour necrosis factor inhibition; VEDO: vedolizumab; RFS: recurrence free survival; PFS: progression free survival; OS: overall survival; mOS: median OS; PD: progressive disease; HR: hazard ratio; adj: adjusted; dev: development cohort; val: validation cohort

## Supplementary Information

**Supplementary table 4: Mouse studies on correlation of TNF inhibition with ICI efficacy**

| Author                        | Type ICI        | Mice                                                                                                                | Immunosuppression                               | N <sub>mice</sub> | Results                                                                                         | Effect   |
|-------------------------------|-----------------|---------------------------------------------------------------------------------------------------------------------|-------------------------------------------------|-------------------|-------------------------------------------------------------------------------------------------|----------|
| Bertrand 2017 <sup>81</sup>   | αPD-1           | C57BL/6 mice<br>B16K1 melanoma<br>αPD-1 d6, 10 and 13                                                               | αTNF 10mg/kg d6, 10, 13 and 16                  | 24                | ↑ tumour control and ↑ survival in αPD-1 + αTNF vs αPD-1 alone                                  | +        |
|                               |                 | Balb/c mice<br>4T1 breast cancer<br>αPD-1 d6, 9 and 13                                                              | αTNF 10mg/kg d6, 9 and 13                       | 6                 | ↑ tumour control in αPD-1 + αTNF vs αPD-1 alone                                                 | +        |
| Perez-Ruiz 2019 <sup>82</sup> | αPD-1 + αCTLA-4 | C57BL/6 mice<br>MC38 colon carcinoma<br>cICI d9 and 15                                                              | αTNF 125µg or etanercept 40µg d9, 11, 13 and 15 | 12-23             | ↑ tumour control in cICI + αTNF/etanercept vs cICI alone no significant differences in survival | +/ $\pm$ |
|                               | αPD-1 + αCTLA-4 | C57BL/6 mice<br>MC38 colon carcinoma<br>DSS induced colitis d9-11<br>cICI d9 and 15                                 | αTNF 125µg or etanercept 40µg d9, 11, 13 and 15 | 11-17             | ↑ tumour control and ↑ survival in cICI + αTNF/etanercept vs cICI alone                         | +        |
|                               | αPD-1 + αCTLA-4 | C57BL/6 mice<br>B16-OVA melanoma<br>cICI d9 and 15                                                                  | αTNF 125µg or etanercept 40µg d9, 11, 13 and 15 | 6                 | ↑ tumour control and ↑ survival in cICI + αTNF/etanercept vs cICI alone                         | +        |
|                               | αPD-1 + αCTLA-4 | Rag2 <sup>-/-</sup> Il2rg <sup>-/-</sup> mice<br>HT29 colon carcinoma<br>PBMC infusion d7<br>cICI d7, 11, 14 and 17 | etanercept 40µg d7, 11, 14 and 17               | 6                 | No significant difference in tumour control                                                     | $\pm$    |

N<sub>mice</sub>: number of mice per group; αPD-1: programmed cell death 1 blockade; αCTLA-4: cytotoxic T lymphocyte-4 blockade; αTNF: tumour necrosis factor inhibition; cICI: combined immune checkpoint inhibition

## Supplementary Information

**Supplementary table 5: Clinical reports on the effects of TNF inhibition for immune-related adverse events on immune checkpoint inhibitor efficacy**

| Author                        | Type ICI           | Cancer        | Design                                                                             | N <sub>IS</sub> /N <sub>total</sub> | Results                                                                              | Effect |
|-------------------------------|--------------------|---------------|------------------------------------------------------------------------------------|-------------------------------------|--------------------------------------------------------------------------------------|--------|
|                               |                    |               | <b>αTNF vs corticosteroids alone</b>                                               |                                     |                                                                                      |        |
| Arriola 2015 <sup>88</sup>    | αCTLA-4            | Solid tumours | OC; within diarrhoea; CS+αTNF vs CS alone                                          | 7/29                                | Trend towards ↑OS with (p=0.23)                                                      | ±/+    |
| Wang 2018 <sup>65</sup>       | αPD-(L)1 ± αCTLA-4 | Solid tumours | OC; within diarrhoea; CS±αTNF vs CS alone (all stages; stage IV malignancies only) | 35/79; 23/61                        | OS no difference or a trend towards ↑OS (p=0.768; 0.263)                             | ±/-    |
| Johnson 2018 <sup>89</sup>    | ICI                | Melanoma      | OC; within diarrhoea; CS±αTNF vs CS alone                                          | 18/40                               | OS no difference (p=0.741)<br>TTF 9.0m (5.6-NR) vs 12.5m (5.8-NR)                    | ±      |
| Lesage 2019 <sup>90</sup>     | ICI                | Melanoma      | OC; OS and PFS of CS+αTNF for colitis vs historical control                        | 27                                  | mOS 12m mPFS 3m 1yOS 65.2%                                                           | N/A    |
| Favara 2020 <sup>91</sup>     | ICI                | Melanoma      | OC; within gr3 diarrhoea/colitis; CS+αTNF vs CS alone                              | 16/56                               | PFS HR 0.7 (0.4-1.3)                                                                 | ±/+    |
| Nahar 2020 <sup>92</sup>      | ICI                | Melanoma      | OC; within colitis; CS+αTNF+other vs CS+αTNF vs CS alone                           | 10 vs 38 vs 52                      | no differences in OS (p=0.73)<br>trend towards ↓PFS in CS+αTNF±other vs CS (p=0.27); | ±/-    |
| Verheijden 2020 <sup>14</sup> | ICI                | Melanoma      | OC; with gr3-4 irAE; CS+αTNF vs CS alone                                           | 65/222                              | OS HR <sub>adj</sub> 1.61 (1.03-2.51)                                                | -      |
| Alexander 2021 <sup>93</sup>  | ICI                | Solid tumours | OC; colitis requiring CS+αTNF                                                      | 111                                 | 1yOS 83%                                                                             | N/A    |
| Araujo 2021 <sup>94</sup>     | ICI                | Solid tumours | OC; irAE requiring αTNF                                                            | 50                                  | Median post-αTNF-initiation OS 13m (7.3-19.3)                                        | N/A    |
| Van Not 2022 <sup>87</sup>    | αPD-1 + αCTLA-4    | Melanoma      | OC; with gr3-4 irAE; CS+ αTNF vs CS alone                                          | 61/276                              | OS HR <sub>adj</sub> 1.44 (0.84-2.49)<br>PFS HR <sub>adj</sub> 1.44 (0.92-2.26)      | ±/-    |
|                               |                    |               | <b>αTNF vs other sIS</b>                                                           |                                     |                                                                                      |        |
| Abu-Sbeih 2019 <sup>84</sup>  | ICI                | Solid tumours | OC; within colitis; CS+αTNF±VEDO vs CS+VEDO                                        | 52/84                               | Trend towards ↓OS (p=0.151)                                                          | ±/-    |

## Supplementary Information

| Author                       | Type ICI                        | Cancer        | Design                                                                                                                         | N <sub>IS</sub> /N <sub>total</sub> | Results                                                                                                                                                                                                        | Effect |
|------------------------------|---------------------------------|---------------|--------------------------------------------------------------------------------------------------------------------------------|-------------------------------------|----------------------------------------------------------------------------------------------------------------------------------------------------------------------------------------------------------------|--------|
| Zou 2021 <sup>85</sup>       | ICI                             | Solid tumours | OC; within colitis; CS+ $\alpha$ TNF vs CS+VEDO; post-irAE OS for all, genitourinary cancer, lung cancer and melanoma patients | 94/156                              | OR <sub>PD,adj</sub> 5.24 (2.33-11.77)<br>OS <sub>all</sub> HR <sub>adj</sub> 2.04 (1.15-3.62)<br>↓OS <sub>genitourinary</sub> (p=0.032)<br>↓OS <sub>lung</sub> (p=0.044)<br>↓OS <sub>melanoma</sub> (p=0.214) | -      |
| Van Not 2022 <sup>87</sup>   | $\alpha$ PD-1 + $\alpha$ CTLA-4 | Melanoma      | OC; with gr3-4 irAE; CS+ $\alpha$ TNF vs CS + other sIS                                                                        | 61/95                               | OS HR 0.99 (0.56-1.76)<br>PFS HR 1.17 (0.71-1.92)                                                                                                                                                              | ±      |
|                              |                                 |               | <b>sIS vs corticosteroids alone</b>                                                                                            |                                     |                                                                                                                                                                                                                |        |
| Burdett 2019 <sup>86</sup>   | ICI                             | Solid tumours | OC; OS of CS+sIS vs historical control                                                                                         | 19                                  | mOS 9.4m                                                                                                                                                                                                       | N/A    |
| Dimitriou 2021 <sup>59</sup> | ICI                             | Melanoma      | OC; within irAEs; CS+ $\alpha$ TNF/ $\alpha$ IL6 vs CS only vs no CS within small subgroups according to therapy and setting   | ≤22/≤54                             | RFS, PF and OS no difference (all p>0.29)                                                                                                                                                                      | ±      |
| Van Not 2022 <sup>87</sup>   | $\alpha$ PD-1 + $\alpha$ CTLA-4 | Melanoma      | OC; with gr3-4 irAE; CS+ sIS vs CS alone                                                                                       | 115/350                             | OS HR <sub>adj</sub> 1.54 (1.03-2.30)<br>PFS HR <sub>adj</sub> 1.40 (1.00-1.97)                                                                                                                                | -      |

$\alpha$ PD-(L)1: programmed cell death (ligand) 1 blockade;  $\alpha$ CTLA-4: cytotoxic T lymphocyte-4 blockade; ICI: immune checkpoint inhibitor; OC: observational cohort study; irAE: immune-related adverse event; CS: corticosteroid; sIS: second line immunosuppression;  $\alpha$ TNF: tumour necrosis factor inhibition; VEDO: vedolizumab;  $\alpha$ IL-6: interleukin-6 blockade; RFS: recurrence free survival; PFS: progression free survival; OS: overall survival; mOS: median OS; TTF: time to treatment failure; HR: hazard ratio; adj: adjusted; NR: not reached; N/A: not applicable.

## Supplementary Information

**Supplementary table 6: Mouse studies on correlation of interleukin-6 (receptor) inhibition with ICI efficacy**

| Author                           | Type ICI        | Mice                                                                                   | Immunosuppression                | N <sub>mice</sub> | Results                                                                                         | Effect |
|----------------------------------|-----------------|----------------------------------------------------------------------------------------|----------------------------------|-------------------|-------------------------------------------------------------------------------------------------|--------|
| Perez-Ruiz 2019 <sup>82</sup>    | αPD-1 + αCTLA-4 | C57BL/6 mice<br>MC38 colon carcinoma<br>cICI d9 and 15                                 | αIL-6 250µg d9, 11, 13 and 15    | 13-14             | ↓ tumour control in cICI + αIL-6 vs cICI alone                                                  | -      |
|                                  | αPD-1 + αCTLA-4 | C57BL/6 mice<br>B16-OVA melanoma<br>cICI d9 and 15                                     | αIL-6 250µg d9, 11, 13 and 15    | 12                | ↓ tumour control in cICI + αIL-6 vs cICI alone                                                  | -      |
| Hailemichael 2022 <sup>109</sup> | αCTLA-4         | C57BL/6 mice<br>B16.BL6 melanoma<br>αCTLA-4 d3, 6 and 9                                | αIL-6 200µg d3, 5, 7 and 9       | 10                | ↑ tumour control and non-significantly ↑ survival in αCTLA-4 + αIL-6 vs αCTLA-4 alone           | +/-    |
|                                  | αCTLA-4         | C57BL/6 mice<br>B16.BL6 melanoma<br>EAE induction on d3<br>αCTLA-4 d3, 6 and 9         | αIL-6 200µg d3, 6 and 9          | 10                | Non-significantly ↑ tumour control in αCTLA-4 + αIL-6 vs αCTLA-4 alone                          | ±      |
|                                  | αCTLA-4         | Balb/c mice<br>CT26 colon carcinoma<br>αCTLA-4 d6, 8, 10 and 12                        | αIL-6 200µg d6, 8, 10 and 12     | 10                | ↑ tumour control and non-significantly ↑ survival in αCTLA-4 + αIL-6 vs αCTLA-4 alone           | +/-    |
|                                  | αCTLA-4         | Balb/c mice<br>CT26 colon carcinoma<br>EAE induction on d3<br>αCTLA-4 d6, 8, 10 and 12 | αIL-6 200µg d6, 8, 10 and 12     | 10                | ↑ tumour control in αCTLA-4 + αIL-6 vs αCTLA-4 alone                                            | +      |
|                                  | αPD-1           | C57BL/6 mice<br>B16.BL6 melanoma<br>EAE induction on d3<br>αPD-1 d3, 6 and 9           | αIL-6 200µg d3, 6 and 9          | 10                | Non-significantly ↑ tumour control and significantly ↑ survival in αPD-1 + αIL-6 vs αPD-1 alone | ±/+    |
| Liu 2022 <sup>102</sup>          | αPD-L1          | 615 mice<br>LA795 lung adenocarcinoma<br>αPD-L1 3 times/w >d12                         | αIL-6 10mg/kg 3 times/w from d12 | 5                 | ↑ tumour control in αPD-L1 + αIL-6 vs αPD-L1 alone                                              | +      |
|                                  | αPD-L1          | DBA-2J mice                                                                            | αIL-6 10mg/kg 3 times/w from d9  | 5                 | ↑ tumour control in αPD-L1 + αIL-6 vs αPD-L1 alone                                              | +      |

## Supplementary Information

| Author                   | Type ICI | Mice                                                                                                       | Immunosuppression                                 | N <sub>mice</sub> | Results                                                                                 | Effect |
|--------------------------|----------|------------------------------------------------------------------------------------------------------------|---------------------------------------------------|-------------------|-----------------------------------------------------------------------------------------|--------|
|                          |          | KLN205 lung squamous carcinoma<br>αPD-L1 3 times/w >d9                                                     |                                                   |                   |                                                                                         |        |
| Li 2018 <sup>107</sup>   | αPD-L1   | Balb/c mice<br>CT26 colon carcinoma<br>αPD-L1 2 times/w >d7                                                | αIL-6 5mg/kg 2 times/w from d7                    | 10                | ↑ tumour control in αPD-L1 + αIL-6 vs αPD-L1 alone                                      | +      |
|                          | αPD-L1   | C57BL/6J mice<br>MC38 colon carcinoma<br>αPD-L1 2 times/w >d7                                              | αIL-6 5mg/kg 2 times/w from d7                    | 10                | ↑ tumour control in αPD-L1 + αIL-6 vs αPD-L1 alone                                      | +      |
| Liu 2017 <sup>105</sup>  | αPD-L1   | Balb/c mice<br>H22 hepatocellular carcinoma + cancer-associated fibroblast injection<br>αPD-L1 weekly >d7, | αIL-6 200µg weekly from d7                        | 10                | ↑ tumour control and survival in αPD-L1 + αIL-6 vs αPD-L1 alone                         | +      |
| Mace 2018 <sup>108</sup> | αPD-L1   | C57BL/6 mice<br>MT5 PDAC<br>αPD-L1 3 times/w from 50-100mm <sup>3</sup>                                    | αIL-6 200µg 3 times/w from 50-100 mm <sup>3</sup> | 5-6               | ↑ tumour control in αPD-L1 + αIL-6 vs αPD-L1 alone                                      | +      |
|                          | αPD-L1   | C57BL/6 mice<br>Panc02 PDAC<br>αPD-L1 3 times/w from 50-100mm <sup>3</sup>                                 | αIL-6 200µg 3 times/w from 50-100mm <sup>3</sup>  | 5-6               | Non-significantly ↑ tumour control in αPD-L1 + αIL-6 vs αPD-L1 alone                    | ±      |
|                          | αPD-L1   | C57BL/6 mice<br>KPC-luc PDAC<br>αPD-L1 3 times/w from visible tumours                                      | αIL-6 200µg 3 times/w from visible tumours        | 5                 | Similar tumour control in αPD-L1 + αIL-6 vs αPD-L1 alone                                | ±      |
|                          | αPD-L1   | KPC-Brca2 mice with spontaneous PDAC<br>αPD-L1 3 times/w from w5                                           | αIL-6 200µg 3 times/w from w5                     | 5                 | Proportionally ↓ PanIN3/PDAC lesions in in αPD-L1 + αIL-6 vs αPD-L1 alone after 2 weeks | +      |



## Supplementary Information

| Author                        | Type ICI | Mice                                                                         | Immunosuppression                           | N <sub>mice</sub> | Results                                                              | Effect |
|-------------------------------|----------|------------------------------------------------------------------------------|---------------------------------------------|-------------------|----------------------------------------------------------------------|--------|
| Tsukamoto 2018 <sup>104</sup> | αPD-L1   | C57BL/6 or Balb/c mice<br>MO4-OVA melanoma<br>αPD-L1 d7, 9 and 11            | αIL-6 200µg d7, 9 and 11                    | 9                 | ↑ tumour control in αPD-L1 + αIL-6 vs αPD-L1 alone                   | +      |
|                               | αPD-L1   | C57BL/6 or Balb/c mice<br>B16F10 melanoma<br>αPD-L1 dd5, 7 and 9             | αIL-6 200µg d5, 7 and 9                     | 5-10              | Non-significantly ↑ tumour control in αPD-L1 + αIL-6 vs αPD-L1 alone | ±      |
|                               | αPD-L1   | C57BL/6 or Balb/c mice<br>CT26 colon carcinoma<br>αPD-L1 d4, 7 and 10        | αIL-6 200µg d4, 7 and 10                    | 5-10              | ↑ tumour control in αPD-L1 + αIL-6 vs αPD-L1 alone                   | +      |
|                               | αPD-L1   | C57BL/6 or Balb/c mice<br>RMA lymphoma<br>αPD-L1 timing unknown              | αIL-6 200µg timing unknown                  | 5-10              | Similar tumour control in αPD-L1 + αIL-6 vs αPD-L1 alone             | ±      |
| Li 2022 <sup>110</sup>        | αPD-1    | Balb/c mice<br>CT26 colon carcinoma<br>αPD-1 every 3d from 100m <sup>3</sup> | αIL-6 100µg every 3d from 100m <sup>3</sup> | 8                 | ↑ tumour control in αPD-1 + αIL-6 vs αPD-1 alone                     | +      |
|                               | αPD-1    | C57BL/6 mice<br>MC38 melanoma<br>αPD-1 every 3d from 100m <sup>3</sup>       | αIL-6 100µg every 3d from 100m <sup>3</sup> | 8                 | ↑ tumour control in αPD-1 + αIL-6 vs αPD-1 alone                     | +      |
|                               | αPD-1    | C57BL/6 mice<br>B16F10 melanoma<br>αPD-1 every 3d from 100m <sup>3</sup>     | αIL-6 100µg every 3d from 100m <sup>3</sup> | 8                 | ↑ tumour control in αPD-1 + αIL-6 vs αPD-1 alone                     | +      |
|                               | αPD-1    | Balb/c mice<br>4T1 breast cancer<br>αPD-1 every 3d from 100m <sup>3</sup>    | αIL-6 100µg every 3d from 100m <sup>3</sup> | 8                 | ↑ tumour control in αPD-1 + αIL-6 vs αPD-1 alone                     | +      |
| Ohno 2017 <sup>106</sup>      | αPD-L1   | Balb/c mice<br>CT26 colon carcinoma<br>αPD-L1 d5, 9, 13, 17 and 21           | αIL-6R 200µg d5, 9, 13, 17 and 21           | 6-7               | Non-significant ↑ tumour control in αPD-L1 + αIL-6R vs αPD-L1 alone  | ±      |

N<sub>mice</sub>: number of mice per group; αPD-(L)1: programmed cell death (ligand) 1 blockade; αCTLA-4: cytotoxic T lymphocyte-4 blockade; IL: interleukin; αIL-6: interleukin-6 inhibition; cICI: combined immune checkpoint inhibition; EAE: experimental autoimmune encephalomyelitis; PDAC: pancreatic ductal adenocarcinoma

## Supplementary Information

**Supplementary table 7: Mouse studies on correlation of Janus (JAK) kinase, mammalian target of rapamycin (mTOR) inhibition or hydroxychloroquine (HCQ) with ICI efficacy**

| Author                      | Type ICI                                        | Mice                                                                          | Immune modulator                           | N <sub>mice</sub> | Results                                                                                | Effect |
|-----------------------------|-------------------------------------------------|-------------------------------------------------------------------------------|--------------------------------------------|-------------------|----------------------------------------------------------------------------------------|--------|
| <b>JAK inhibitors</b>       |                                                 |                                                                               |                                            |                   |                                                                                        |        |
| Zak 2022 <sup>119</sup>     | αCTLA-4+<br>αPD-1                               | C57BL/6 mice<br>MC38 colon cancer<br>ICI d8 and 15                            | Ruxolitinib 30 mg/kg,<br>d8-15             | 10                | ↑ tumour control in ruxolitinib +<br>cICI vs cICI alone.                               | +      |
|                             | αCTLA-4+<br>αPD-1                               | BALB/c mice<br>A20 lymphoma<br>ICI every 10d from d8 on.                      | Ruxolitinib 30 mg/kg,<br>daily from d8 on. | 7                 | ↑ tumour control in ruxolitinib +<br>cICI vs cICI alone.                               | +      |
|                             | αCTLA-4+<br>αPD-1                               | C57BL/6 mice<br>LLC1 lung cancer<br>ICI every 7d from d8 on.                  | Ruxolitinib 30 mg/kg,<br>daily from d8 on. | 5                 | ↑ tumour control in ruxolitinib +<br>cICI vs cICI alone.                               | +      |
| Benci 2016 <sup>120</sup>   | αCTLA-4                                         | C57BL/6 mice<br>Res 499 melanoma<br>ICI d5, 8 and 11                          | Ruxolitinib 60mg/kg d8-<br>12              | 10                | ↑ tumour control in ruxolitinib +<br>αCTLA-4 vs αCTLA-4 alone.                         | +      |
|                             | αCTLA-4                                         | C57BL/6 mice<br>Res 499 melanoma<br>ICI d5, 8 and 11                          | Ruxolitinib 60mg/kg d5-<br>9               | 7                 | No difference in tumor control<br>between ruxolitinib + αCTLA-4 and<br>αCTLA-4 alone   | ±      |
|                             | αCTLA-4                                         | C57BL/6 mice<br>Res 237 breast cancer<br>ICI d5, 8 and 11                     | Ruxolitinib 60mg/kg<br>d10-14              | 6                 | ↑ tumour control in ruxolitinib +<br>αCTLA-4 vs αCTLA-4 alone.                         | +      |
| Lu 2017 <sup>121</sup>      | αPD-1                                           | C57BL/6 mice<br>PANC02-H7 pancreatic<br>cancer<br>ICI d5, 7, 9, 11, 13 and 15 | Ruxolitinib 50mg/kg<br>d5-15               | 5                 | ↑ tumour control in ruxolitinib +<br>αPD-1 vs αPD-1 alone.                             | +      |
| <b>mTOR inhibitors</b>      |                                                 |                                                                               |                                            |                   |                                                                                        |        |
| Langdon 2018 <sup>122</sup> | αPD-1 or<br>αPD-L1 or<br>αCTLA-4<br>monotherapy | C57BL/6 mice<br>MC38 colon carcinoma<br>ICI 2x weekly from d1 on              | Vistusertib 15mg/kg<br>Daily from d1 on    | 15                | ↑ survival in vistusertib + ICI<br>groups vs ICI alone (for all 3 ICI<br>mono groups). | +      |

## Supplementary Information

| Author                     | Type ICI             | Mice                                                                                                                                                        | Immune modulator                              | N <sub>mice</sub> | Results                                                                               | Effect |
|----------------------------|----------------------|-------------------------------------------------------------------------------------------------------------------------------------------------------------|-----------------------------------------------|-------------------|---------------------------------------------------------------------------------------|--------|
|                            | αCTLA-4              | BALB/c mice<br>CT-26 colon carcinoma<br>ICI 2x weekly from d4 on                                                                                            | Vistusertib 15mg/kg<br>Daily from d4 on       | 10                | Non-significant ↑ tumour control in vistusertib + αCTLA-4 vs αCTLA-4 alone.           | ±      |
| Bai 2021 <sup>123</sup>    | αPD-1                | C57BL/6 mice<br>SMM103 melanoma<br>ICI d7, 10, 13, 16, 19 and 22                                                                                            | Sirolimus 2mg/kg<br>d7, 10, 13, 16, 19 and 22 | 4                 | ↑ tumour control in sirolimus + αPD-1 vs αPD-1 alone.                                 | +      |
| Xia 2022 <sup>124</sup>    | αPD-1                | C57BL/6J mice<br>MB49 bladder cancer<br>ICI d0, 3, 6 and 9 from 100 mm <sup>3</sup>                                                                         | Everolimus 2mg/kg, d0-4 and d7-11             | 4-5               | Non-significantly ↓ tumour control with high-dose everolimus + αPD-1 vs αPD-1 alone.  | ±      |
|                            | αPD-1                | C57BL/6J mice<br>MB49 bladder cancer<br>ICI d0, 3, 6 and 9 from 100 mm <sup>3</sup>                                                                         | Everolimus 0.25mg/kg, d0-4 and d7-11          | 4-5               | Non-significantly ↑ tumour control with low-dose everolimus + αPD-1 vs αPD-1 alone.   | ±      |
| Song 2022 <sup>125</sup>   | αPD-1 + radiotherapy | C57BL/6 mice<br>CaSki cervical cancer<br>ICI d11, 13 and 15<br>RT 1x 6Gy 24h after ICI/everolimus.                                                          | Everolimus 0.25mg/kg, d11, 13 and 15          | 8                 | ↑ tumour control with everolimus + αPD-1 vs αPD-1 alone. All groups also received RT. | +      |
| <b>Hydroxychloroquine</b>  |                      |                                                                                                                                                             |                                               |                   |                                                                                       |        |
| Sharma 2020 <sup>126</sup> | αPD-1                | C57BL6/J mice<br>B16 melanoma<br>ICI d0, 2, 4, 6, 8 and 10 from 50 mm <sup>3</sup>                                                                          | HCQ 60mg/kg d0-11                             | 5                 | ↑ tumour control and survival with HCQ + αPD-1 vs αPD-1 alone.                        | +      |
|                            | αPD-1                | BRaf <sup>CA</sup> Pten <sup>loxP</sup><br>Tyr::CreER <sup>T2</sup> mice topical<br>4-HT induced melanoma<br>ICI d0, 2, 4, 6, 8 and 10 from palpable tumour | HCQ 60mg/kg d0-11                             | 4                 | ↑ tumour control with HCQ + αPD-1 vs αPD-1 alone.                                     | +      |

## Supplementary Information

| Author                          | Type ICI | Mice                                                                  | Immune modulator         | N <sub>mice</sub> | Results                                                             | Effect |
|---------------------------------|----------|-----------------------------------------------------------------------|--------------------------|-------------------|---------------------------------------------------------------------|--------|
| Wabitsch<br>2021 <sup>127</sup> | αPD-1    | C57BL/6 mice<br>MC38 colon carcinoma<br>ICI d7, 10 and 15             | HCQ 25mg/kg HCQ<br>d5-19 | 12                | ↓ tumour control with HCQ + αPD-1 vs αPD-1 alone.                   | -      |
|                                 | αPD-1    | C57BL/6 mice<br>RIL-175 hepatocellular carcinoma<br>ICI d7, 10 and 15 | HCQ 25mg/kg HCQ<br>d5-19 | 8                 | Non-significantly ↓ tumour control with HCQ + αPD-1 vs αPD-1 alone. | ±      |
|                                 | αPD-1    | BALB/c mice<br>CT-26 colon carcinoma<br>ICI d7, 10 and 15             | HCQ 25mg/kg HCQ<br>d5-19 | 12                | ↓ tumour control with HCQ + αPD-1 vs αPD-1 alone.                   | -      |
| Krueger<br>2021 <sup>128</sup>  | αPD-1    | C57BL/6J mice<br>B16-PD-L1 melanoma<br>ICI d4, 7, 11 and 14           | HCQ 40mg/kg d11-16       | 14                | ↓ tumour control with HCQ + αPD-1 vs αPD-1 alone.                   | -      |

N<sub>mice</sub>: number of mice per group; αPD-(L)1: programmed cell death (ligand) 1 blockade; αCTLA-4: cytotoxic T lymphocyte-4 blockade; αIL-6: IL: interleukin-6 inhibition; cICI: combined immune checkpoint inhibition; HCQ: Hydroxychloroquine.

## Supplementary Information

**Supplementary table 8: Ongoing clinical trials on immunosuppression for irAE management**

| ClinicalTrials.gov Identifier | Patients                            | Treatment arms  | ICI efficacy outcomes (all secondary) |
|-------------------------------|-------------------------------------|-----------------|---------------------------------------|
| NCT04797325                   | vedolizumab                         | ICI colitis     | none                                  |
|                               | prednisolone ± infliximab           |                 |                                       |
| NCT04305145                   | infliximab                          | ICI colitis     | 2yPFS; 2yOS; 2yBORR                   |
|                               | corticosteroids                     |                 |                                       |
| NCT04407247                   | infliximab + corticosteroids        | ICI colitis     | 3mOS                                  |
|                               | vedolizumab + corticosteroids       |                 |                                       |
| NCT05335928                   | abatacept + SoC                     | ICI myocarditis | none                                  |
|                               | placebo + SoC                       |                 |                                       |
| NCT05345847                   | active surveillance                 | ICI hepatitis   | 1yPFS                                 |
|                               | immediate high-dose corticosteroids |                 |                                       |

SoC: standard of care; ICI: immune checkpoint inhibitor; PFS: progression free survival; OS: overall survival; BORR: best overall response rate
